# Supplementary material for: Guidance to rational use of pharmaceuticals in gallbladder sarcomatoid carcinoma using patient-derived cancer cells and whole exome sequencing
Source: PubMed Central journal article supplement (PMC5354913; doi:10.18632/oncotarget.14146), 2016-12-24
Supplement: oncotarget-08-5349-s001.pdf [file oncotarget-08-5349-s001.pdf]

## Guidance to rational use of pharmaceuticals in gallbladder sarcomatoid carcinoma using patient-derived cancer cells and whole exome sequencing

### SUPPLEMENTARY FIGURES AND TABLES

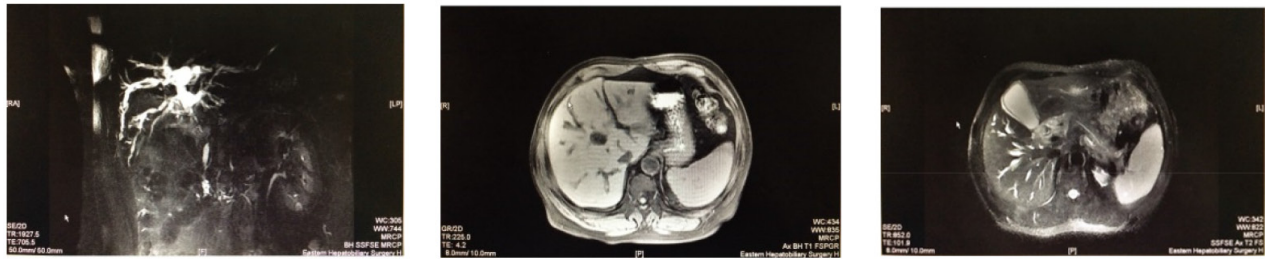

**Supplementary Figure S1: The results of Magnetic Resonance Cholangiopancreatography (MRCP) and Computed Tomography (CT) on this gallbladder sarcomatoid carcinoma patient. Interruption of extrahepatic bile duct structure and gallbladder wall thickening was observed**

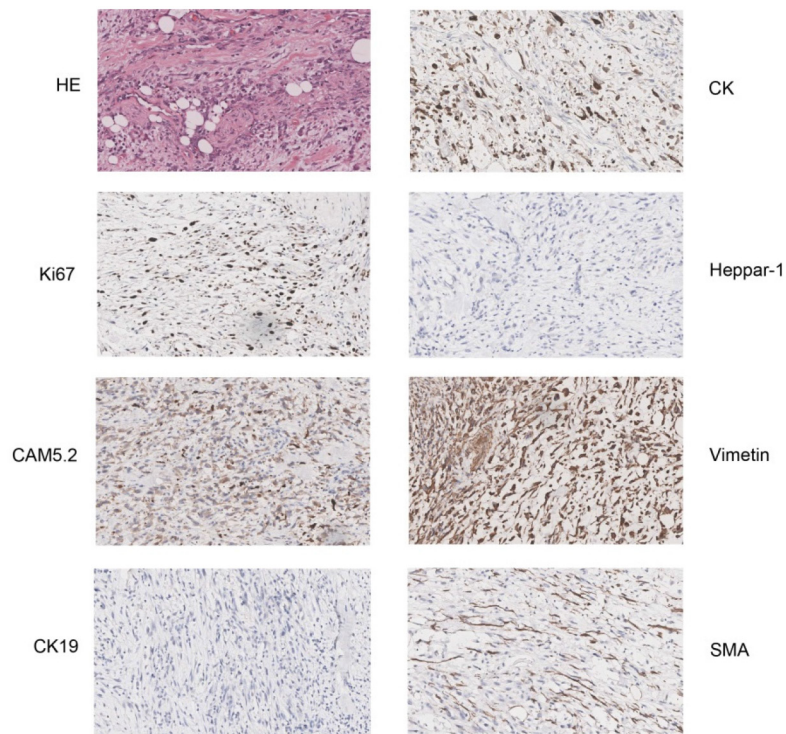

**Supplementary Figure S2: Hematein Eosin (HE) staining and immunohistochemical profiles of clinical markers in this gallbladder sarcomatoid carcinoma sample.** Representative examples of immunohistochemical staining for pan-Cytokeratin (CK), Ki67, Heppar-1, CAM5, Vimetin, CK19, and SMA on gallbladder sarcomatoid carcinoma. The prevalence of positive cases within the different tumor types were shown. Original magnifications 20 x.

Supplementary Table S1: Patient characteristics

| Patient ID                                            | Gender | Age | HCVAb                                     | HBsAg    | HBeAg    | HBeAb                      | HbcAb    | CEA (ng/ml) | CA19-9 (U/ml)                        | CA125 (U/ml) | CA72-4 (U/ml) | AFP (ng/ml) |
|-------------------------------------------------------|--------|-----|-------------------------------------------|----------|----------|----------------------------|----------|-------------|--------------------------------------|--------------|---------------|-------------|
| 138816                                                | Male   | 65  | Negative                                  | Positive | Negative | Negative                   | Positive | 3.1         | 95.0                                 | 17.9         | 1.0           | 4.3         |
| <b>Total bilirubin (<math>\mu\text{mol/L}</math>)</b> |        |     | <b>TBA (<math>\mu\text{mol/L}</math>)</b> |          |          | <b>Tumor encapsulation</b> |          |             | <b>Microscopic vascular invasion</b> |              |               |             |
| 121.2                                                 |        |     | 19.9                                      |          |          | No                         |          |             | No                                   |              |               |             |

Supplementary Table S2: The Short Tandem Repeat (STR) of the three GSC PDCs and para-carcinoma tissue

|                | Para-carcinoma tissue |      | JXQ-3D-001 |      | JXQ-3D-002 |      | JXQ-3D-003 |      |
|----------------|-----------------------|------|------------|------|------------|------|------------|------|
| <b>D5S818</b>  | 11                    | 11   | 11         | 11   | 11         | 11   | 11         | 11   |
| <b>D13S317</b> | 11                    | 12   | 11         | 12   | 11         | 12   | 11         | 12   |
| <b>D7S820</b>  | 10                    | 12   | 10         | 12   | 10         | 12   | 10         | 12   |
| <b>D16S539</b> | 10                    | 11   | 10         | 11   | 10         | 11   | 10         | 11   |
| <b>VWA</b>     | 16                    | 19   | 19         | 19   | 19         | 19   | 19         | 19   |
| <b>THCC01</b>  | 7                     | 7    | 7          | 7    | 7          | 7    | 7          | 7    |
| <b>AMEL</b>    | X                     | Y    | X          | Y    | X          | X    | X          | Y    |
| <b>TPOX</b>    | 8                     | 11   | 8          | 11   | 8          | 11   | 8          | 11   |
| <b>CSF1PO</b>  | 9                     | 11   | 9          | 9    | 9          | 9    | 9          | 9    |
| <b>D12S391</b> | 17                    | 18   | 17         | 17   | 17         | 17   | 17         | 17   |
| <b>FGA</b>     | 19                    | 20   | 19         | 19   | 19         | 19   | 19         | 19   |
| <b>D2S1338</b> | 16                    | 19   | 16         | 19   | 16         | 19   | 16         | 19   |
| <b>D21S11</b>  | 29                    | 32.2 | 29         | 32.2 | 29         | 32.2 | 29         | 32.2 |
| <b>D18S51</b>  | 14                    | 16   | 14         | 16   | 14         | 16   | 14         | 16   |
| <b>D8S1179</b> | 10                    | 15   | 10         | 15   | 10         | 15   | 10         | 15   |
| <b>D3S1358</b> | 15                    | 15   | 15         | 15   | 15         | 15   | 15         | 15   |
| <b>D6S1043</b> | 12                    | 14   | 12         | 14   | 12         | 14   | 12         | 14   |
| <b>PENTAE</b>  | 5                     | 11   | 5          | 11   | 5          | 11   | 5          | 11   |
| <b>D19S433</b> | 13.2                  | 14   | 13.2       | 13.2 | 13.2       | 13.2 | 13.2       | 13.2 |
| <b>PENTAD</b>  | 9                     | 13   | 9          | 9    | 9          | 9    | 9          | 9    |

**Supplementary Table S3: The mean coverage of whole exome sequencing in three GSC PDCs samples**

| <b>Sample</b>     | <b>Mean coverage</b> | <b>Duplicate rate</b> | <b>On target (%)</b> | <b>On flanking (%)</b> | <b>Off target (%)</b> |
|-------------------|----------------------|-----------------------|----------------------|------------------------|-----------------------|
| <b>BLD</b>        | 100.22               | 0.12                  | 52.49                | 27.71                  | 19.80                 |
| <b>JXQ-3D-001</b> | 107.32               | 0.13                  | 53.79                | 26.91                  | 19.30                 |
| <b>JXQ-3D-002</b> | 101.49               | 0.13                  | 54.39                | 26.14                  | 19.48                 |
| <b>JXQ-3D-003</b> | 105.92               | 0.13                  | 53.99                | 26.65                  | 19.37                 |

**Supplementary Table S4: The SNV events of the three GSC PDCs**

See Supplementary File 1

Supplementary Table S5: The genes with amplifications and deep deletions in three GSC PDCs

|                                  | JXQ-3D-001 | JXQ-3D-002 | JXQ-3D-003 |
|----------------------------------|------------|------------|------------|
| <b>Genes with amplifications</b> | PRKCI      | PRKCI      | PRKCI      |
|                                  | PIK3CA     | PIK3CA     | PIK3CA     |
|                                  | SOX2       | SOX2       | SOX2       |
|                                  | KLHL6      | KLHL6      | KLHL6      |
|                                  | ETV5       | ETV5       | ETV5       |
|                                  | BCL6       | BCL6       | BCL6       |
|                                  | FGFR3      | CCNE1      | FGFR3      |
|                                  | SLIT2      | CEBPA      | SLIT2      |
|                                  |            | AKT2       | SDHA       |
|                                  |            | AXL        | IL7R       |
|                                  |            | CD79A      | RICTOR     |
|                                  |            | CIC        | FGF10      |
|                                  |            | ERCC1      | THK2       |
|                                  |            |            | NTRK1      |
|                                  |            | PTK2       |            |
| <b>Genes with deep deletions</b> | MAP3K1     | RUNX1      | MAP3K1     |
|                                  | TNK2       | ERG        | TNK2       |
|                                  |            | TMPRSS2    | PIK3R1     |
|                                  |            | U2AF1      | APC        |
|                                  |            | SIK1       | EPHA2      |
|                                  |            |            | SDHB       |
|                                  |            |            | ARID1A     |
|                                  |            |            | FGR        |
|                                  |            |            | LCK        |
|                                  |            |            | SF3B1      |
|                                  |            |            | IDH1       |
|                                  |            |            | ERBB4      |
|                                  |            |            | BARD1      |
|                                  |            |            | SPTA1      |
|                                  |            | SDHC       |            |
|                                  |            | DDR2       |            |

Supplementary Table S6: The mean IC50 values and SDs from three experiments with inhibitors

| Drug name   | Target                                   | IC50(μM)       |               |               |
|-------------|------------------------------------------|----------------|---------------|---------------|
|             |                                          | JXQ-3D-001     | JXQ-3D-002    | JXQ-3D-003    |
| GDC0941     | pan-PI3K                                 | 0.564 ± 0.304  | 0.283 ± 0.113 | 0.326 ± 0.204 |
| PF-04691502 | PI3K/mTOR                                | 0.094 ± 0.006  | 0.063 ± 0.014 | 0.068 ± 0.001 |
| AZD4547     | FGFR1/2/3                                | 0.330 ± 0.108  | > 10          | > 10          |
| LY2874455   | FGFR1/2/3/4                              | 0.142 ± 0.079  | 1.333 ± 0.266 | 1.792 ± 0.589 |
| LEE011      | CDK4/6                                   | >30            | >30           | >30           |
| AXL-1717    | IGF1R                                    | 0.217 ± 0.008  | 0.286 ± 0.008 | 0.290 ± 0.003 |
| ABT-888     | PARP1, PARP2                             | 11.102 ± 1.080 | 8.920 ± 2.973 | >30           |
| Sorafenib   | intracellular CRAF,<br>BRAF, mutant BRAF | 6.978 ± 0.092  | 7.689 ± 0.073 | 6.835 ± 0.008 |
| Vemurafenib | BRAF                                     | 2.206 ± 0.053  | 5.503 ± 0.384 | 5.630 ± 0.694 |
